# Supplementary material for: 江戸中期の上方落語家足引清八の芸態--『艶容女舞衣』生玉の段に見る (城南地域特集)
Source: HighWire-hosted journal article supplement (doi:10.1101/gr.133546.111), 2007-08-01
Supplement: Birnbaum_Supplemental_Table_1.xlsx [file Birnbaum_Supplemental_Table_1.xlsx]

## Sheet: ChIP-Seq peaks summary
	Supplemental Table 1: Analysis of ChIP-Seq enhancer-associated datasets for exon overlap
	H3K4me1 ChIP-Seq datasets from human cell lines
			Total ChIP-Seq peaks		ChIP-Seq peaks overlapping all exons			ChIP-Seq peaks overlapping coding exons			ChIP-Seq peaks overlapping coding exons (excluding the 1st exon)
	Antibody	Cell line	Peaks	Average peak width	eExon peaks	% from total	Average peak width	eExon peaks	% from total	Average peak width	eExon peaks	% from total	Average peak width
	H3K4me1	GM12878	66675	3633.65	18540	0.278065	4811.19	15221	0.228286	4830.56	6183	0.09	4932.3
	H3K4me1	K562	101711	2938.01	24668	0.24253	4155.32	19926	0.195908	4180.98	7755	0.08	4087.5
	H3K4me1	HMEC	193159	2016.12	35097	0.1817	3049.47	28228	0.146139	3069.81	11040	0.06	3006.53
	H3K4me1	HSMM	194920	1997.38	35819	0.183763	2931.55	28647	0.146968	2960.13	11644	0.06	2926.3
	H3K4me1	HUVEC	95032	2686.59	26384	0.277633	3734.04	21406	0.22525	3769.06	7495	0.08	3781.47
	H3K4me1	NHEK	95938	2711.68	21932	0.228606	3391.38	17493	0.182337	3430.99	6917	0.07	3592.36
	H3K4me1	NHLF	187763	1974.91	34978	0.186288	2922.97	28122	0.149774	2960.46	11550	0.06	2943.84
	H3K4me1	H1-hESC	284181	1571.04	41596	0.146372	2416.89	33215	0.11688	2476.12	4505	0.02	2539.88
	Average		152422	2441.17	29876.8	0.21562	3426.6	24032.2	0.173943	3459.77	8386.12	0.065	3476.27
	H3K27ac ChIP-Seq datasets from human cell lines
			Total ChIP-Seq peaks		ChIP-Seq peaks overlapping all exons			ChIP-Seq peaks overlapping coding exons			ChIP-Seq peaks overlapping coding exons (excluding the 1st exon)
	Antibody	Cell line	Peaks	Average peak width	eExon peaks	% from total	Average peak width	eExon peaks	% from total	Average peak width	eExon peaks	% from total	Average peak width
	H3K27ac	GM12878	32535	3868.04	14188	0.436084	5105.51	11530	0.354388	5083.61	3700	0.11	5061.58
	H3K27ac	K562	47681	2725.15	16303	0.341918	4245.13	13145	0.275686	4270.53	4197	0.09	3957.1
	H3K27ac	HMEC	50340	2990.21	16663	0.331009	3953.53	13317	0.264541	3966.99	4350	0.09	3895.21
	H3K27ac	HSMM	63726	2418.52	18247	0.286335	3373.64	14589	0.228933	3391.48	4817	0.08	3382.24
	H3K27ac	HUVEC	55162	2694.97	18701	0.33902	3730.38	15174	0.275081	3730.14	4877	0.09	3735.66
	H3K27ac	NHEK	47643	3080.84	16471	0.345717	4101.67	13210	0.277271	4101.23	4385	0.09	4055.35
	H3K27ac	NHLF	39760	3222.37	15488	0.389537	4534.48	12562	0.315946	4514.96	3931	0.1	4508.53
	H3K27ac	HepG2	26130	3855	12534	0.479679	4945.87	10103	0.386644	4914.77	2984	0.11	4965.89
	Average		45372.1	3106.89	16074.4	0.368662	4248.78	12953.8	0.297311	4246.72	4155.12	0.095	4195.2
	p300 ChIP-Seq datasets from human cell lines
			Total ChIP-Seq peaks		ChIP-Seq peaks overlapping all exons			ChIP-Seq peaks overlapping coding exons			ChIP-Seq peaks overlapping coding exons (excluding the 1st exon)
	Antibody	Cell line	Peaks	Average peak width	eExon peaks	% from total	Average peak width	eExon peaks	% from total	Average peak width	eExon peaks	% from total	Average peak width
	p300	GM12878	51260	462.16	7740	0.150995	606.961	5086	0.0992197	655.235	1352	0.0263753	636.43
	p300	K562	17883	260.619	2211	0.123637	387.402	1158	0.0647542	405.983	456	0.0254991	466.983
	p300	HepG2	36493	365.186	10084	0.276327	521.983	6053	0.165867	533.982	2553	0.0699586	532.863
	p300	HeLa S3	29985	489.663	1771	0.0590629	569.735	1122	0.0374187	580.489	836	0.0278806	574.281
	p300	SK-N-SH RA	55944	428.607	5910.5	0.1059	453.492	3387.5	0.0605516	453.778	2102	0.0375733	472.131
	p300	T-47D	12101.5	547.353	2597	0.221022	569.819	1547	0.127835	575.326	645	0.0532992	641.394
	Average		33944.4	425.598	5052.25	0.156157	518.232	3058.92	0.0926078	534.132	1324	0.0400977	554.014
	p300 ChIP-Seq datasets from mouse E11.5 tissues
			Total ChIP-Seq peaks		ChIP-Seq peaks overlapping all exons			ChIP-Seq peaks overlapping coding exons			ChIP-Seq peaks overlapping coding exons (excluding the 1st exon)
	Antibody	Cell line	Peaks	Average peak width	eExon peaks	% from total	Average peak width	eExon peaks	% from total	Average peak width	eExon peaks	% from total	Average peak width
	p300	Forebrain	2453	815.889	215	0.0876478	901.232	143	0.058296	906.769	104	0.04	925.52
	p300	Midbrain	561	716.953	43	0.0766488	689.372	25	0.0445633	713	20	0.04	721
	p300	Limb	2105	682.591	252	0.119715	696.535	152	0.0731591	719.181	98	0.05	725
	Average		1706.33	738.478	170	0.0946705	762.38	107.333	0.0586728	779.65	74	0.0433333	790.507
	Intersection of ChIP-Seq datasets from GM12878 cells
			Total ChIP-Seq peaks		ChIP-Seq peaks overlapping all exons			ChIP-Seq peaks overlapping coding exons			ChIP-Seq peaks overlapping coding exons (excluded the 1st exon)
	Antibody	Cell line	Peaks	Average peak width	eExon peaks	% from total	Average peak width	eExon peaks	% from total	Average peak width	eExon peaks	% from total	Average peak width
	H3K4me1	GM12878	66675	3633.65	18540	0.278065	4811.19	15221	0.228286	4830.56	6183	0.09	4932.3
	H3K27ac	GM12878	32535	3868.04	14188	0.436084	5105.51	11530	0.354388	5083.61	3700	0.11	5061.58
	p300	GM12878	51260	462.16	7740	0.150995	606.961	5086	0.0992197	655.235	1352	0.0263753	636.43
	Intersection		16624	495.813	4238	0.254933	693.675	2532	0.15231	711.746	1352	0.0813282	636.43
	Intersection of ChIP-Seq datasets from K562 cells
			Total ChIP-Seq peaks		ChIP-Seq peaks overlapping exons			ChIP-Seq peaks overlapping coding exons			ChIP-Seq peaks overlapping coding exons (excluding the 1st exon)
	Antibody	Cell line	Peaks	Average peak width	eExon peaks	% from total	Average peak width	eExon peaks	% from total	Average peak width	eExon peaks	% from total	Average peak width
	H3K4me1	K562	101711	2938.01	24668	0.24253	4155.32	19926	0.195908	4180.98	7755	0.08	4087.5
	H3K27ac	K562	47681	2725.15	16303	0.341918	4245.13	13145	0.275686	4270.53	4197	0.09	3957.1
	p300	K562	17883	260.619	2211	0.123637	387.402	1158	0.0647542	405.983	456	0.0254991	466.983
	Intersection		9245	376.473	1350	0.146025	477.326	729	0.0788534	501.826	456	0.049324	466.983

## Sheet: ChIP data set web links
Supplemental Table 1: Links for all downloaded data.
ChIP-Seq data set	Cell line	Genome assembly	UCSC genome browser location	URL for data download
H3K4me1	GM12878	hg18	http://genome.ucsc.edu/cgi-bin/hgTrackUi?hgsid=236757081&c=chrX&g=wgEncodeBroadChipSeq	http://hgdownload.cse.ucsc.edu/goldenPath/hg18/encodeDCC/wgEncodeBroadChipSeq/wgEncodeBroadChipSeqPeaksGm12878H3k4me1.broadPeak.gz
H3K4me1	K562	hg18	http://genome.ucsc.edu/cgi-bin/hgTrackUi?hgsid=236757081&c=chrX&g=wgEncodeBroadChipSeq	http://hgdownload.cse.ucsc.edu/goldenPath/hg18/encodeDCC/wgEncodeBroadChipSeq/wgEncodeBroadChipSeqPeaksK562H3k4me1.broadPeak.gz
H3K4me1	HMEC	hg18	http://genome.ucsc.edu/cgi-bin/hgTrackUi?hgsid=236757081&c=chrX&g=wgEncodeBroadChipSeq	http://hgdownload.cse.ucsc.edu/goldenPath/hg18/encodeDCC/wgEncodeBroadChipSeq/wgEncodeBroadChipSeqPeaksHmecH3k4me1.broadPeak.gz
H3K4me1	HSMM	hg18	http://genome.ucsc.edu/cgi-bin/hgTrackUi?hgsid=236757081&c=chrX&g=wgEncodeBroadChipSeq	http://hgdownload.cse.ucsc.edu/goldenPath/hg18/encodeDCC/wgEncodeBroadChipSeq/wgEncodeBroadChipSeqPeaksHsmmH3k4me1.broadPeak.gz
H3K4me1	HUVEC	hg18	http://genome.ucsc.edu/cgi-bin/hgTrackUi?hgsid=236757081&c=chrX&g=wgEncodeBroadChipSeq	http://hgdownload.cse.ucsc.edu/goldenPath/hg18/encodeDCC/wgEncodeBroadChipSeq/wgEncodeBroadChipSeqPeaksHuvecH3k4me1.broadPeak.gz
H3K4me1	NHEK	hg18	http://genome.ucsc.edu/cgi-bin/hgTrackUi?hgsid=236757081&c=chrX&g=wgEncodeBroadChipSeq	http://hgdownload.cse.ucsc.edu/goldenPath/hg18/encodeDCC/wgEncodeBroadChipSeq/wgEncodeBroadChipSeqPeaksNhekH3k4me1.broadPeak.gz
H3K4me1	NHLF	hg18	http://genome.ucsc.edu/cgi-bin/hgTrackUi?hgsid=236757081&c=chrX&g=wgEncodeBroadChipSeq	http://hgdownload.cse.ucsc.edu/goldenPath/hg18/encodeDCC/wgEncodeBroadChipSeq/wgEncodeBroadChipSeqPeaksNhlfH3k4me1.broadPeak.gz
H3K4me1	H1-hESC	hg18	http://genome.ucsc.edu/cgi-bin/hgTrackUi?hgsid=236757081&c=chrX&g=wgEncodeBroadChipSeq	http://hgdownload.cse.ucsc.edu/goldenPath/hg18/encodeDCC/wgEncodeBroadChipSeq/wgEncodeBroadChipSeqPeaksH1hescH3k4me1.broadPeak.gz
H3K27ac	GM12878	hg18	http://genome.ucsc.edu/cgi-bin/hgTrackUi?hgsid=236757081&c=chrX&g=wgEncodeBroadChipSeq	http://hgdownload.cse.ucsc.edu/goldenPath/hg18/encodeDCC/wgEncodeBroadChipSeq/wgEncodeBroadChipSeqPeaksGm12878H3k27ac.broadPeak.gz
H3K27ac	K562	hg18	http://genome.ucsc.edu/cgi-bin/hgTrackUi?hgsid=236757081&c=chrX&g=wgEncodeBroadChipSeq	http://hgdownload.cse.ucsc.edu/goldenPath/hg18/encodeDCC/wgEncodeBroadChipSeq/wgEncodeBroadChipSeqPeaksK562H3k27ac.broadPeak.gz
H3K27ac	HMEC	hg18	http://genome.ucsc.edu/cgi-bin/hgTrackUi?hgsid=236757081&c=chrX&g=wgEncodeBroadChipSeq	http://hgdownload.cse.ucsc.edu/goldenPath/hg18/encodeDCC/wgEncodeBroadChipSeq/wgEncodeBroadChipSeqPeaksHmecH3k27ac.broadPeak.gz
H3K27ac	HSMM	hg18	http://genome.ucsc.edu/cgi-bin/hgTrackUi?hgsid=236757081&c=chrX&g=wgEncodeBroadChipSeq	http://hgdownload.cse.ucsc.edu/goldenPath/hg18/encodeDCC/wgEncodeBroadChipSeq/wgEncodeBroadChipSeqPeaksHsmmH3k27ac.broadPeak.gz
H3K27ac	HUVEC	hg18	http://genome.ucsc.edu/cgi-bin/hgTrackUi?hgsid=236757081&c=chrX&g=wgEncodeBroadChipSeq	http://hgdownload.cse.ucsc.edu/goldenPath/hg18/encodeDCC/wgEncodeBroadChipSeq/wgEncodeBroadChipSeqPeaksHuvecH3k27ac.broadPeak.gz
H3K27ac	NHEK	hg18	http://genome.ucsc.edu/cgi-bin/hgTrackUi?hgsid=236757081&c=chrX&g=wgEncodeBroadChipSeq	http://hgdownload.cse.ucsc.edu/goldenPath/hg18/encodeDCC/wgEncodeBroadChipSeq/wgEncodeBroadChipSeqPeaksNhekH3k27ac.broadPeak.gz
H3K27ac	NHLF	hg18	http://genome.ucsc.edu/cgi-bin/hgTrackUi?hgsid=236757081&c=chrX&g=wgEncodeBroadChipSeq	http://hgdownload.cse.ucsc.edu/goldenPath/hg18/encodeDCC/wgEncodeBroadChipSeq/wgEncodeBroadChipSeqPeaksNhlfH3k27ac.broadPeak.gz
H3K27ac	HepG2	hg18	http://genome.ucsc.edu/cgi-bin/hgTrackUi?hgsid=236757081&c=chrX&g=wgEncodeBroadChipSeq	http://hgdownload.cse.ucsc.edu/goldenPath/hg18/encodeDCC/wgEncodeBroadChipSeq/wgEncodeBroadChipSeqPeaksHepg2H3k27ac.broadPeak.gz
p300	GM12878	hg19	SYDH TFBS	http://hgdownload.cse.ucsc.edu/goldenPath/hg19/encodeDCC/wgEncodeSydhTfbs/wgEncodeSydhTfbsGm12878P300bStdPk.narrowPeak.gz	http://hgdownload.cse.ucsc.edu/goldenPath/hg19/encodeDCC/wgEncodeSydhTfbs/wgEncodeSydhTfbsGm12878P300sc584IggmusPk.narrowPeak.gz
p300	K562	hg19	SYDH TFBS	http://hgdownload.cse.ucsc.edu/goldenPath/hg19/encodeDCC/wgEncodeSydhTfbs/wgEncodeSydhTfbsK562P300sc584sc48343IggrabPk.narrowPeak.gz
p300	HepG2	hg19	SYDH TFBS	http://hgdownload.cse.ucsc.edu/goldenPath/hg19/encodeDCC/wgEncodeSydhTfbs/wgEncodeSydhTfbsHepg2P300sc582IggrabPk.narrowPeak.gz
p300	HeLa S3	hg19	SYDH TFBS	http://hgdownload.cse.ucsc.edu/goldenPath/hg19/encodeDCC/wgEncodeSydhTfbs/wgEncodeSydhTfbsHelas3P300sc584sc584IggrabPk.narrowPeak.gz
p300	SK-N-SH RA	hg19	HAIB TFBS	http://hgdownload.cse.ucsc.edu/goldenPath/hg19/encodeDCC/wgEncodeHaibTfbs/wgEncodeHaibTfbsSknshraP300V0416102PkRep1.broadPeak.gz	http://hgdownload.cse.ucsc.edu/goldenPath/hg19/encodeDCC/wgEncodeHaibTfbs/wgEncodeHaibTfbsSknshraP300V0416102PkRep2.broadPeak.gz
p300	T-47D	hg19	HAIB TFBS	http://hgdownload.cse.ucsc.edu/goldenPath/hg19/encodeDCC/wgEncodeHaibTfbs/wgEncodeHaibTfbsT47dP300V0416102Dm002p1hPkRep1.broadPeak.gz	http://hgdownload.cse.ucsc.edu/goldenPath/hg19/encodeDCC/wgEncodeHaibTfbs/wgEncodeHaibTfbsT47dP300V0416102Dm002p1hPkRep2.broadPeak.gz
ChIP-Seq data set	Mouse E11.5 tissue	Genome	URL for data download
p300	Forebrain	mm9	http://www.ncbi.nlm.nih.gov/geo/query/acc.cgi?acc=GSE13845
p300	Midbrain	mm9	http://www.ncbi.nlm.nih.gov/geo/query/acc.cgi?acc=GSE13845
p300	Limb	mm9	http://www.ncbi.nlm.nih.gov/geo/query/acc.cgi?acc=GSE13845
