# Supplementary material for: 江戸中期の上方落語家足引清八の芸態--『艶容女舞衣』生玉の段に見る (城南地域特集)
Source: HighWire-hosted journal article supplement (doi:10.1101/gr.133546.111), 2007-08-01
Supplement: Birnbaum_Supplemental_Table_2.xlsx [file Birnbaum_Supplemental_Table_2.xlsx]

## Sheet: Peaks overlap with SCEs
Supplemental Table 2: ChIP-Seq peaks overlapping with synonymous constraint elements (SCEs)
Overlap of the GM12878 ChIP-Seq datasets with SCEs
		Total ChIP-Seq peaks overlapping with coding exons		Coding exon ChIP-Seq peaks overlapping with SCE9 windows		Coding exon ChIP-Seq peaks overlapping with SCE15 windows		Coding exon ChIP-Seq peaks overlapping with SCE30 windows
Antibody	Cell line	Peaks	Average peak width	Peaks	% from total	Peaks	% from total	Peaks	% from total
H3K4me1	GM12878	15221	4830.56	1699	0.111622	1865	0.122528	2035	0.133697
H3K27ac	GM12878	11530	5083.61	1555	0.134866	1650	0.143105	1683	0.145967
p300	GM12878	5086	655.235	394	0.0774676	424	0.0833661	421	0.0827762
Intersection		2532	711.746	212	0.0837283	234	0.0924171	246	0.0971564
Overlap of the K562 ChIP-Seq datasets with SCEs
		Total ChIP-Seq peaks overlapping with coding exons		Coding ChIP-Seq peaks overlapping with SCE9 windows		Coding exon ChIP-Seq peaks overlapping with SCE15 windows		Coding exon ChIP-Seq peaks overlapping with SCE30 windows
Antibody	Cell line	Peaks	Average peak width	Peaks	% from total	Peaks	% from total	Peaks	% from total
H3K4me1	K562	19926	4180.98	1983	0.0995182	2174	0.109104	2300	0.115427
H3K27ac	K562	13145	4270.53	1641	0.124838	1753	0.133359	1769	0.134576
p300	K562	1158	405.983	101	0.0872193	97	0.0837651	107	0.0924007
Intersection		729	501.826	70	0.0960219	63	0.0864198	68	0.0932785
