# Supplementary material for: 江戸中期の上方落語家足引清八の芸態--『艶容女舞衣』生玉の段に見る (城南地域特集)
Source: HighWire-hosted journal article supplement (doi:10.1101/gr.133546.111), 2007-08-01
Supplement: Birnbaum_Supplemental_Table_3_re-revised.xlsx [file Birnbaum_Supplemental_Table_3_re-revised.xlsx]

## Sheet: Limb p300 all exons
Supplemental Table 3: Limb p300 ChIP-Seq peaks that overlap exons.
eExon candidate gene Symbol	Chromosome (mm9)	Start	End	Is the gene whose exon overlaps the ChIP-Seq peak expressed in the limb?	Limb expressed genes within a 2Mb window (+/- 1Mb from the exon)
Slc39a10	chr1	46910250	46910676	No	Fem1c	Ldb1	Pprc1	Pitx3	Nfkb2	Neurl1a
Gm973	chr1	59573025	59573401	No
Mtap2	chr1	66297950	66298401	No	Myl1
Chpf,Tmem198	chr1	75475475	75476176	No	Rqcd1	Wnt6	Wnt10a	Ihh	Mnt	Nxn	Hif1a	Scx	Smad2
Irs1	chr1	82287875	82288451	No	Srsf5
Srgap2	chr1	133421625	133422176	No
Ptprv	chr1	137023275	137023751	No	Myog
Hmcn1	chr1	152440675	152441176	No	Ivns1abp	Rnf2
4930452N14Rik	chr1	156930300	156931076	No	Cacna1e	Ier5	Mr1	Stx6	Xpr1	Acbd6	Lhx4	Qsox1	Cep350	Tor1aip1	Tor1aip2	Fam163a
BC034090	chr1	157059675	157060451	No
Dnm3	chr1	163946525	163948101	Yes	Dnm3os
Dnm3os, Mir199a-2	chr1	164146625	164148276	Yes	Dnm3os
Ppox	chr1	173210900	173211726	No	Usf1
Kif26b	chr1	180800100	180801476	No
Cnst	chr1	181511650	181512301	No
Cdc42bpa	chr1	182064125	182064551	No
Gm17762, A930004D18Rik	chr2	17949250	17949851	No	Mllt10
Mllt10	chr2	17977025	17978576	Yes	Mllt10
Enkur	chr2	21126650	21127251	No
Edf1	chr2	25412975	25413676	No	Notch1
Pkn3	chr2	29933150	29933676	No	Asb6	Prrx2
B230120H23Rik	chr2	73224900	73225351	No	Cdca7	8430437L04Rik	Sp3	Ola1	Sp9	Cir1	Scrn3	Gpr155	Wipf1	Chrna1	LOC329427	Chn1	Atf2	Atp5g3	4930441J16Rik
Sp3	chr2	72817450	72817826	Yes	Sp3	Sp9	Cir1	Atf2
AK039065	chr2	73224900	73225351	No	Cdca7	8430437L04Rik	Sp3	Ola1	Sp9	Cir1	Scrn3	Gpr155	Wipf1	Chrna1	LOC329427	Chn1	Atf2	Atp5g3	4930441J16Rik
Hoxd9	chr2	74536825	74537376	Yes	Atf2	Evx2	Hoxd13	Hoxd12	Hoxd11	Hoxd10	Hoxd9	Hoxd8	Hoxd4	Nfe2l2
Timm10	chr2	84666600	84667476	No	Ssrp1	Aplnr
Ndufs3, Kbtbd4	chr2	90744625	90745126	No	Psmc3	Lrp4
Mapk8ip1	chr2	92229275	92229826	No	Lrp4	Mdk	Dgkz
AK144367	chr2	115893125	115893776	No
A430105I19Rik	chr2	118582700	118583151	No
Serf2	chr2	121275000	121275551	No	Ubr1
Gabpb1	chr2	126500825	126501301	Yes	Cops2	Gabpb1
Sox12	chr2	152222125	152222601	No	Rspo4	Plagl2
H13	chr2	152531525	152532401	No	Rspo4	Plagl2
H13	chr2	152533100	152533826	No	Rspo4	Plagl2
Asxl1	chr2	153172050	153172776	No	Plagl2
Src	chr2	157290275	157291001	No	Rbl1	Ctnnbl1
D630003M21Rik	chr2	158028650	158029001	No	Rbl1	Ctnnbl1
Zfp335	chr2	164736950	164737476	No	Rbpjl	Mmp9	Cdh22
Nfatc2	chr2	168427125	168428001	Yes	Nfatc2	Sall4
A630075F10Rik	chr2	169895825	169896526	No	Tshz2
BC051628	chr2	180954475	180954976	No	Bhlhe23	Sox18	Polr3k
AK005828	chr3	7943250	7944651	No
Tbl1xr1	chr3	21975350	21975801	No
Ect2	chr3	27052775	27053201	No
Mecom	chr3	30445500	30446376	No	Skil
Pcdh18	chr3	49561075	49561701	No
Maml3	chr3	51908725	51909301	No
AK144834	chr3	51983500	51984176	No	Elf2	4930583H14Rik	Ndufc1	Naa15	Rab33b	Setd7	5031434O11Rik	Mgst2	Maml3	Foxo1	Gm2447	LOC622124	Cog6	Lhfp
Pdgfc	chr3	80840625	80841451	No
Trim2	chr3	84073600	84074651	No	Sfrp2
Mex3a	chr3	88335825	88336626	No	Mir9-1	Rhbg	1700021C14Rik	Cct3	0610031J06Rik	Tmem79	Smg5	Paqr6	Bglap-rs1	Bglap2	Bglap	Pmf1	Slc25a44	Sema4a	Lmna
Mtx1	chr3	89018025	89018601	No
Efna1	chr3	89084575	89085026	No	Crtc2
Notch2	chr3	97916525	97917076	Yes	Notch2
Stxbp3a	chr3	108602850	108603351	No	Taf13
Elovl6	chr3	129234750	129235376	No
Lef1	chr3	130813350	130814026	Yes	Lef1	Dkk2
AK034519	chr3	133899325	133899851	No
Lphn2	chr3	148652200	148652726	No
1300002K09Rik	chr4	45861300	45861826	No
Astn2	chr4	65573300	65573976	No	Pappa
Mllt3	chr4	87480200	87480626	Yes	Mllt3
Fggy	chr4	95488350	95489376	No	Jun
AK085758	chr4	100200000	100200776	No
Gm12830	chr4	114494475	114494976	No	Foxd2	9130206I24Rik	Foxe3	Cmpk1	Stil	Tal1	Pdzk1ip1	Cyp4x1	Cyp4a29-ps	Cyp4a12a	Cyp4a12b	Cyp4a30b-ps	Cyp4a14	Cyp4a10	Cyp4a31
Mknk1	chr4	115527550	115527951	No	Tal1	Akr1a4
1700029G01Rik	chr4	125827550	125827901	No	Thrap3	Eif2c3	Eif2c1
Ptpru	chr4	131393525	131394426	No	Gmeb1	Taf12	Eya3
Wasf2	chr4	132741100	132741651	No	Gmeb1	Taf12	Eya3	Hmgn2	Lin28a
Id3	chr4	135699175	135700276	Yes	Srsf10	Id3	Hnrnpr
Ubr4	chr4	138936150	138936676	No
AK043690	chr4	140239825	140241076	No	4933427I22Rik	Klhdc7a	Igsf21	Arhgef10l	Rcc2	Padi6	Padi4	Padi3	Padi1	4930515B02Rik	Padi2	Sdhb	Atp13a2	Mfap2	Crocc
AK040418	chr4	140513700	140514151	No	Zbtb17	Fblim1
Sema3a	chr5	13124925	13126126	Yes	Sema3a
Stx18	chr5	38497475	38497851	No	Msx1	Msx1as
Hps4	chr5	112793300	112793801	No
Myo18b	chr5	113287400	113287801	No
Cmklr1	chr5	114099950	114100751	No
Ubc	chr5	125870100	125870726	No	Ncor2
Aacs	chr5	125955725	125956251	No	Ncor2
Sfswap	chr5	130006875	130007526	No	Fzd10	Ran	Sbds
Gtf2ird1	chr5	134931800	134932426	No	Clip2	Fzd9
Wbscr28	chr5	135376950	135377601	No	Clip2	Fzd9
Cux1	chr5	137042950	137043451	No	Polr2j	Trip6
Pcolce	chr5	138051775	138052726	No	Trip6	Fbxo24	Zscan21	Mcm7
Uspl1	chr5	149995800	149996301	No
AK021342	chr5	152170725	152171551	No
Dync1i1	chr6	5956050	5956501	No	Asb4	Dlx6	Dlx5
Dync1i1	chr6	5977500	5978276	No	Asb4	Dlx6	Dlx5
Capza2	chr6	17586900	17587401	No	Met	Wnt2	Asz1
AK005895	chr6	30410100	30411151	No
Svopl	chr6	37996800	37997326	No	Creb3l2
Hoxa9	chr6	52176000	52176976	Yes	Cbx3	Hoxa4	Hoxa5	Hoxa6	Hoxa7	Hoxa9	Hoxa10	Hoxa11	Hoxa11as	Hoxa13	Evx1
Hoxa10	chr6	52180250	52181326	Yes	Cbx3	Hoxa4	Hoxa5	Hoxa6	Hoxa7	Hoxa9	Hoxa10	Hoxa11	Hoxa11as	Hoxa13	Evx1
Hoxa10	chr6	52189775	52190626	Yes	Cbx3	Hoxa4	Hoxa5	Hoxa6	Hoxa7	Hoxa9	Hoxa10	Hoxa11	Hoxa11as	Hoxa13	Evx1
Hoxa11	chr6	52194400	52195101	Yes	Cbx3	Hoxa4	Hoxa5	Hoxa6	Hoxa7	Hoxa9	Hoxa10	Hoxa11	Hoxa11as	Hoxa13	Evx1
AK033508	chr6	52215600	52216226	No	Nfe2l3	Hnrnpa2b1	Cbx3	Snx10	Skap2	Hoxa1	Hoxa2	Hoxa3	Hoxa4	2700086A05Rik	Hoxa5	Hoxa6	Mira	Hoxa7	Hoxa9
Ino80b	chr6	83071575	83072826	No	Ankrd53
Rtkn	chr6	83086650	83087901	No	Ankrd53
Magi1	chr6	93862275	93863426	No
Lrig1	chr6	94577450	94578326	No
Zfp524	chr7	4966575	4967226	No
Olfr1344	chr7	6362800	6363201	No	Vmn1r58	Vmn1r59	Vmn2r28	Vmn1r60	Vmn1r61	Vmn1r62	Vmn1r186	Vmn1r63	Vmn1r187	Vmn1r64	Vmn1r65
Gng8	chr7	17476200	17477201	No	Npas1
Zfp568	chr7	30768600	30769351	No	Dpf1	Zfp84	Zfp260	Zfp146	Wdr62	Usf2	Lsr
Ptov1	chr7	52125025	52125376	No	Nr1h2	Tead2	Ruvbl2	Bax	Dbp
Pcsk6	chr7	73183725	73184976	No
Pgpep1l	chr7	75408200	75409076	No	Mef2a
AK035406	chr7	82473875	82474476	No
Eed	chr7	97129225	97129751	Yes	Eed
BC048663	chr7	97277925	97278551	No	Fzd4	Prss23	Me3	Ccdc81	l7Rn6	Eed	E230029C05Rik	Picalm	Ccdc83	Sytl2	Ccdc89	Crebzf	Tmem126a	Tmem126b
AK031468	chr7	118266050	118266601	No	Usp47	Dkk3
Micalcl	chr7	119534075	119534901	No	Dkk3	Tead1
Sox6	chr7	122740625	122741301	Yes	Sox6
Arl6ip1	chr7	125272475	125273176	No
Iqck	chr7	125998825	125999476	No
Zfp668	chr7	135019150	135019751	No	Mylpf	Zfp764	Zfp629	Myst1	Fus
Trim72	chr7	135148300	135148951	No	Mylpf	Zfp764	Zfp629	Myst1	Fus
Lsp1	chr7	149672675	149673251	No	Ctsd	Igf2
Nctc1	chr7	149739775	149740401	No	Ctsd	Igf2
1810010D01Rik	chr7	152392000	152392676	No
3930402G23Rik	chr8	10924200	10925651	No
Myst3	chr8	23969700	23970126	No	Dkk4	Plat	Ank1	Sfrp1
Jund	chr8	73222475	73222951	No	Crtc1	Ssbp4	Lsm4	Nr2f6
Klf2	chr8	74842450	74843026	No	Nr2f6	Med26
Ier2	chr8	87186575	87187101	No	Nfix
Nfix	chr8	87246275	87247401	Yes	Nfix
Chd9	chr8	93478525	93479026	No	Tox3	Irx3
Gtl3	chr8	97958575	97959226	No	Polr2c
Gm17296	chr8	128998800	128999176	No
AK050164	chr8	129350200	129350826	No	BC021891	Kcnk1	Slc35f3	1810063B05Rik	Gm17296	Irf2bp2	Tomm20	Rbm34	Pard3
Pard3	chr8	129901625	129902251	No	Nrp1
Sik3	chr9	46016075	46016526	No
Ccdc33	chr9	57961450	57962151	No	Arid3b	Stra6	Pml
Islr	chr9	58006025	58006426	No	Arid3b	Stra6	Pml
AK028224	chr9	62191475	62192026	No	Rplp1	Kif23	Paqr5	Glce	Mir5133	A730043L09	Spesp1	Anp32a	Coro2b	Itga11	Fem1b	Cln6	Gm10653	Calml4	Pias1
Calml4, Gm10653	chr9	62705875	62706901	No	Pias1	Smad3
2010321M09Rik	chr9	64808650	64809101	No	Smad6	Igdcc3	2810417H13Rik
Rora	chr9	69195450	69196051	No	Foxb1
Uba7	chr9	107884000	107885401	No	Dag1
Cmtm8	chr9	114752625	114753026	No	Ubp1
Nup43	chr10	7387275	7387651	No
Arg1	chr10	24646675	24647351	No
AK040320	chr10	36860425	36861226	No
Pdss2	chr10	43159325	43159776	No	Prdm1
Ddit4	chr10	59414450	59415326	No
AK079018	chr10	66466800	66467901	No
1810008A18Rik	chr10	76949550	76950026	No
AK148204	chr10	79315500	79316001	No	Madcam1	Gm16517	Cdc34	Gzmm	Bsg	Hcn2	Polrmt	Fgf22	Rnf126	Fstl3	Prss57	Palm	9130017N09Rik	E130317F20Rik	Ptbp1
Btbd2	chr10	80118700	80119076	No	Polrmt	Med16	Arid3a	Polr2e	Gpx4	Midn	Tcf3	Hmg20b	Aes	Tle2
Nuak1	chr10	83903200	83904026	No
Dusp6	chr10	98725325	98726051	No	Dusp6	Kitl
AK043505	chr10	98761275	98762376	No	Gm8633	Atp2b1	Poc1b	Galnt4	Dusp6	Gm20110	Gm18409	Csl	Kitl
Cpm	chr10	117106925	117107701	No	Frs2
Ctdsp2	chr10	126415625	126416001	No	Cdk4	Gli1
Smtn	chr11	3439000	3439676	No	Patz1
5730522E02Rik	chr11	26110350	26110776	No	Fancl	Vrk2	Gm12070
Vrk2	chr11	26389425	26390626	No
Itk	chr11	46174675	46175476	No
Pdlim4	chr11	53873450	53874326	Yes	Pdlim4
P4ha2	chr11	53940075	53941026	No	Pdlim4
Mfap4	chr11	61297825	61299051	No	Usp22
AK041628	chr11	68009275	68009751	No
Slc43a2	chr11	75385100	75386001	No	Mnt	Nxn
Rab34	chr11	78001900	78002576	No	Phf12
AK019731	chr11	79483425	79484001	No	Nlk	Fam58b	1810012P15Rik	Nos2	Lgals9	Ksr1
Trim37	chr11	86940450	86940851	No
Hoxb4	chr11	96180400	96180826	No	Hoxb13	Hoxb7	Hoxb6	Nfe2l1	Sp6
Kpnb1	chr11	97048950	97049451	No	Hoxb13	Hoxb7	Hoxb6	Nfe2l1	Sp6	Med1
E130012A19Rik	chr11	97490475	97490926	No	Nfe2l1	Sp6	Med1	Neurod2	Ppp1r1b
Plxdc1	chr11	97793500	97794051	No	Sp6	Med1	Neurod2	Ppp1r1b	Med24
Tns4	chr11	98933025	98934051	No	Med1	Neurod2	Ppp1r1b	Med24	Rara	Igfbp4	Smarce1
Plekhh3	chr11	101031900	101032351	No	Meox1
Fzd2	chr11	102464200	102465901	No	Meox1	Hdac5	Ubtf	Hexim1
2810433D01Rik	chr11	102485275	102486126	No	Rdm1	Arl4d	Dhx8	Etv4	Meox1	Sost	Dusp3	1700006E09Rik	Mpp3	Cd300lg	Mpp2	Ppy	Pyy	Nags	Tmem101
Mrc2	chr11	105153750	105154776	No	Myl4	Psmc5
Taco1	chr11	105927725	105928401	No	Psmc5
Ccdc46	chr11	108619050	108619901	No	Prkar1a
AK007042	chr11	114059450	114060076	No
AK136642	chr11	116896675	116897651	No	Srp68	Galr2	Exoc7	Foxj1	Rnf157	Fam100b	Gm7367	Qrich2	Prpsap1	Sphk1	Ube2o	Aanat	Rhbdf2	Cygb	Gm11744
-Sept9	chr11	117127025	117127626	No
Ccdc40	chr11	119090150	119091101	No	Cbx2
AK013668	chr11	120092600	120093001	No	Ccdc40	Gaa	Eif4a3	Card14	Sgsh	Slc26a11	Mir1932	A730011L01Rik	Nptx1	Gm11762	Rptor	Chmp6	Baiap2	Aatk	Mir338
Csnk1d	chr11	120851975	120852476	No	Thoc4
Id2	chr12	25779375	25780051	Yes	Taf1b	Id2
Hdac9	chr12	34900325	34901151	No	Twist1
Hdac9	chr12	34904950	34905851	No	Twist1
Slc38a6,Trmt5	chr12	74387625	74388051	No	Six1	Mnat1	Hif1a
Rad51l1	chr12	80607300	80608776	No	Zfp36l1
Zfp36l1	chr12	81213750	81214601	Yes	Zfp36l1	Srsf5
Tmed10	chr12	86715650	86716176	No	Tgfb3
6430527G18Rik	chr12	88225475	88226301	No	Tgfb3	Snw1
Clmn	chr12	106007225	106008051	No	Gsc	Dicer1
4831426I19Rik	chr12	106177650	106178051	No	Gsc	Dicer1
Vrk1	chr12	107309550	107310351	No
Ptpdc1	chr13	48701225	48701726	No	Barx1
Rnf44	chr13	54795125	54795726	No	Mxd3
Cxcl14	chr13	56390500	56390976	No	Mxd3	Pitx1	Smad5
Gas1	chr13	60278475	60279626	No
Ptch1	chr13	63626100	63627051	Yes	Zfp934	Ptch1
Cdc14b	chr13	64306475	64306926	No	Ptch1
Gm15450, Rps23	chr13	91062400	91062801	No	Ssbp2
AK043659	chr13	91510075	91511126	No	Atp6ap1l	Rps23	Gm15450	Atg10	A830009L08Rik	Ssbp2	4833422C13Rik	Acot12	Zcchc9	Ckmt2	Rasgrf2
Ssbp2	chr13	91599625	91601001	Yes	Ssbp2
Scamp1	chr13	95055575	95056076	No
Tnpo1	chr13	99696025	99696551	No	Btf3	Foxd1
Nln	chr13	104813375	104813776	No
3110070M22Rik	chr13	120276325	120276701	No
Kcnma1	chr14	24270800	24271326	No
Cacna2d3	chr14	29785450	29786401	No	Wnt5a
Btd	chr14	32474800	32476151	No	Ncoa4
Jub	chr14	55191975	55192326	No	Rem2	Myh7
Bmp1	chr14	70874150	70875001	No	Polr3d
Gm6999	chr14	80357700	80358151	No
AK048595	chr14	121646500	121646976	No
Sub1	chr15	11923425	11923976	Yes	Sub1
Vps13b	chr15	35462825	35463501	No	Osr2
Eif3h	chr15	51629800	51630776	No	Trps1	Med30
Heatr7a	chr15	76276925	76277601	No	Scx	Zfp647	Rbfox2
AK131739	chr15	78743600	78744301	No
AK159003	chr15	85413125	85413426	No
Slc38a1	chr15	96473325	96473701	No	Dbx2
AK139359	chr15	102488050	102488601	No	Krt18	Eif4b	Tenc1	Spryd3	Igfbp6	Soat2	Csad	Zfp740	Itgb7	Rarg	Mfsd5	Espl1	Pfdn5	Myg1	Aaas
Hoxc5	chr15	102844750	102845326	Yes	Zfp740	Rarg	Myg1	Sp7	Hoxc13	Hoxc12	Hoxc11	Hoxc10	Hoxc9	Hoxc6	Hoxc5	Hoxc4	Nfe2	Zfp385a	Itga5
Cbx5	chr15	103045525	103045951	No	Zfp740	Rarg	Myg1	Sp7	Hoxc13	Hoxc12	Hoxc11	Hoxc10	Hoxc9	Hoxc6	Hoxc5	Hoxc4	Nfe2	Zfp385a	Itga5
Mir484	chr16	14159500	14160276	No	Ntan1	Snai2
Fgd4	chr16	16560250	16560726	No	Mcm4
Ephb3	chr16	21210700	21211376	Yes	Polr2h	Ephb3
Ccdc50	chr16	27389150	27389526	No
Casr	chr16	36509375	36509801	No
Wdr52	chr16	44394450	44395151	No	Zbtb20	Boc
Park2, Pacrg	chr17	11032825	11033301	No
AK011460	chr17	24665075	24665401	No
Grm4	chr17	27558850	27559826	No	Nkx2-5	Zbtb9	Rps10	Zfp523	Tead3
Hmga1	chr17	27692650	27693601	No	Nkx2-5	Zbtb9	Rps10	Zfp523	Tead3
AK043085	chr17	48201625	48202551	No
Tgif1	chr17	71198725	71199501	No
AK054493	chr17	73607925	73608426	No
3110002H16Rik	chr18	12346800	12347351	No
Nme5	chr18	34738525	34738951	No	Wnt8a	Brd8	Egr1
Sema6a	chr18	47528425	47528951	No	Fem1c
AK163160	chr18	55149925	55151076	No
Zfp532	chr18	65741200	65742101	No
Smad7	chr18	75526200	75527051	No	Smad2
Smarca2	chr19	26679075	26679776	No	Dmrt2
Mgea5	chr19	45857725	45858251	No	Lbx1	Fgf8	Ldb1	Pprc1	Pitx3	Nfkb2
Itprip	chr19	47993500	47994001	No	Neurl1a
Trub1	chr19	57561500	57561851	No
Trub1	chr19	57565350	57565751	No	Dclre1a	Nhlrc2	Adrb1	A630007B06Rik	Tdrd1	Vwa2	Afap1l2	Ablim1	B230217O12Rik	Fam160b1	Trub1	6720468P15Rik	Atrnl1	Gfra1	Gm10007
Tmem47	chrX	78315525	78316101	No
Pgk1	chrX	103381825	103382701	No

## Sheet: Exons selected for enhancer exp
Supplemental Table 3: Coding exons selected for enhancer assays.
eExon candidate gene Symbol	Genomic coordinates of eExon candidate (mm9)	Limb expressed genes within the 2Mb window	The distance between the eExon candidate and limb expressed gene/s
Stx18	chr5: 38497475-38497851	Msx1	281 Kb
Dync1i1	chr6: 5956050-5956501	Dlx5,Dlx6, Dss1, Asb4	876 Kb (from Dlx5)
Dync1i1	chr6: 5977500-5978276	Dlx5,Dlx6, Dss1, Asb4	854 Kb (from Dlx5)
Hdac9	chr12: 34900325-34901151	Twist1	258 Kb
Hdac9	chr12: 34904950-34905851	Twist1	262 Kb
C14orf49	chr12: 106177650-106178051	Dicer1	187 Kb
Cdc14b	chr13: 64306475-64306926	Ptch1	640 Kb
