# Supplementary material for: 江戸中期の上方落語家足引清八の芸態--『艶容女舞衣』生玉の段に見る (城南地域特集)
Source: HighWire-hosted journal article supplement (doi:10.1101/gr.133546.111), 2007-08-01
Supplement: Birnbaum_Supplemental_Table_4.xlsx [file Birnbaum_Supplemental_Table_4.xlsx]

## Sheet: Zebrafish enahncer results
Supplemental Table 4: Zebrafish enhancer assay results of DYNC1I1 eExons 15 & 17 and HDAC9 eExons 18 & 19.
DYNC1I1 eExon 15								DYNC1I1 eExon 17
	5' intron	Exon	3' intron	5' intron+Exon	p300 peak				p300 peak
Pectoral fin	9 (5%)	10 (4%)	0 (0%)	84 (61%)	89 (58%)			Pectoral fin	0 (0%)
Caudal fin	49 (28%)	112 (44%)	0 (0%)	122 (89%)	138 (91%)			Caudal fin	0 (0%)
Dorsal/Anal Fin	49 (28%)	76 (30%)	0 (0%)	118 (86%)	128 (84%)			Dorsal/Anal Fin	0 (0%)
Somitic muscle	25 (14%)	51 (20%)	0 (0%)	31(23%)	30 (20%)			Somitic muscle	0 (0%)
Non specific	12 (7%)	20 (8%)	0 (0%)	9 (7%)	14 (9%)			Non specific	19 (10%)
Negative	119 (68%)	124 (49%)	173 (100%)	13 (9%)	14 (9%)			Negative	172 (90%)
Total fish examined	175	253	173	137	152			Total fish examined	191
HDAC9 eExon 18								HDAC9 eExon 19
	Distal 5' intron	Proximal 5' intron	Exon	Proximal 5' intron + Exon	p300 peak				p300 peak
Pectoral fin	0 (0%)	9 (7%)	23 (11%)	9 (9%)	21 (16%)			Pectoral fin	8 (3%)
Caudal fin	0 (0%)	17 (13%)	56 (27%)	3 (3%)	9 (7%)			Caudal fin	0 (0%)
Branchial arch	0 (0%)	56 (43%)	100 (48%)	84 (81%)	111 (82%)			Branchial arch	0 (0%)
Brain	0 (0%)	0 (0%)	23 (11%)	0 (0%)	0 (0%)			Brain	0 (0%)
Non-specific	0 (0%)	52 (40%)	23 (11%)	0 (0%)	0 (0%)			Non-specific	12 (5%)
Negative	100 (100%)	28 (22%)	81 (39%)	20 (19%)	24 (18%)			Negative	209 (91%)
Total fish examined	100	130	207	104	135			Total fish examined	229
