# Supplementary material for: 江戸中期の上方落語家足引清八の芸態--『艶容女舞衣』生玉の段に見る (城南地域特集)
Source: HighWire-hosted journal article supplement (doi:10.1101/gr.133546.111), 2007-08-01
Supplement: Birnbaum_Supplemental_Table_5.xlsx [file Birnbaum_Supplemental_Table_5.xlsx]

## Sheet: eExon candidate primers
	eExon candidate primers used for enhancer assay
		eExon candidate	Transcript ID	p300 ID	Limb expressed genes within 2MB	Corrdinates (hg18)	Primer fwd	Primer rev	size
	1	Stx18 eExon 5	NM_016930.2	limb.607	Msx1	chr4:4,510,080-4,510,468	CACCTATGGCATTTTGCGAAGAAG	TTAGAATGTGAGTGGCCAAGG	867bp
	2	Dync1i1 eExon 15	NM_004411.4	limb.719	Dlx5, Dlx6	chr7:95543084-95543539	CACCTGTCTGGAATGTCTC	TAAGTGATTTTTGGCCAATGC	608bp
		5' intron segment					CACCTGTCTGGAATGTCTC	GAGACCGTGAAGACTTTGTGG	268bp
		Exon segment					CACCACAAAGTCTTCACGGTCTC	CTCGGTGTCATTGTTGAGGTT	176bp
		3' intron segment					CACCTCTGGAACCTCAACAATGA	TAAGTGATTTTTGGCCAATGC	2175bp
	3	Dync1i1 eExon 17	NM_004411.4	limb.720	Dlx5, Dlx6	chr7:95564858-95565640	CACCTTACTGGAAAGGCCCAAGT	TGTCAGACTGTGTTAGCTTCAGTG	1406bp
	4	Hdac9 eExon 19	NM_058176.2	limb.1448	Twist1	chr7:18,840,873-18,841,694	CACCATAAAACCCCATGCCATCTTT	TATGCACTTGTTCTGCACTGG	1102bp
		Distal 5' intron segment					CACCATAAAACCCCATGCCATCTTT	GAGCATTTTCGCAATTCTTG	302bp
		Proximal 5' intron segment					CACCTCAAGAATTGCGAAAATGCTC	TGTGGAGACAACCTTTCTGATTT	497bp
		Exon segment					CACCAAATCAGAAAGGTTGTCTCCACA	TATGCACTTGTTCTGCACTGG	355bp
	5	Hdac9 eExon 18	NM_058176.2	limb.1449	Twist1	chr7:18,835,582-18,836,493	CACCATCCAAGCAATCCCTCTCCTA	GACTCAGGCGTGTATGGAAAA	1694bp
	6	C14orf49 eExon 16	NM_152592.3	limb.1504	Dicer1	chr14:94,968,026-94,968,419	CACCTGGGGCTTCTTGAAATC	GAGACGGCCACTAGGTGTCA	514bp
	7	Cdc14b eExon	uc004awl.1	limb.1597	Ptch1	chr9:98,317,656-98,318,095	CACCAGGAACAGTGAAGCCCACCT	TGAGTCCCAAAGTATGAAACCTG	555bp

## Sheet: ChIP-qPCR primers
Supplemental Table 5: qPCR primers used for histone modification signatures (H3K4me1, H3Kme3, H3K27ac, H3K36me3)
Region	Primers	Forward primer	Reverse primer	PCR size (bp)
Dync1i1	Dync1i1 exon 6	TTACAGGAGACGACTGCACAA	GACTGATGTGTTGCAAGAGGAG	117
	Dync1i1 exon 11	TGTGATGTCAGTCTGCTTTGC	TTCTTCGATGACTGCGATTGT	101
Dync1i1 eExon 15	eExon 15 A	TTCTCGAGGACTTTCATCTCG	GAGAGACCGTGAAGACTTAGTGG	119
	eExon 15 B	TGTGTACGATGTCATGTGGTC	CTCACCTCGGTGTCACTGTT	105
Dlx5 coding	Dlx5 exon 2	GGGCGAGGTACTGAGTCTTCT	GGTGAGGATGGTGAATGGTAA	112
	Dlx5 exon 3	GGTGACTGTGGCGAGTTACAC	GATCATGAAAAACGGGGAGAT	81
Dlx5 promoter	pDlx5 E site	GCGGTGGCTGTTCTTCTACT	ACAGCCATGTCTGCTTAGACC	82
	pDlx5 B site	CTTAGTGGGATGATGGGAAGC	TGTGGAGTCCTGAGAAACAGG	119
Dlx6 coding	Dlx6 exon 2	GAAGCCTCGGACCATTTATTC	GTCCTAAGGAAGCAGCCAGTT	136
Dlx6 promoter	Dlx6 TSS	TTAACAAGGCCCTGCTCACTA	GCAGAGGTGGTTCTCTTCCTC	87

## Sheet: 3C primers
Supplmental Table 5: Primers used for 3C analysis
Region	Primers	Forward primer	Reverse primer	PCR size (bp)
Dync1i1 eExon 15	eExon 15 RS1	GAACACCAAGTAAGATGGGCTTA	CTGTGTGCCATGGTTGTACC	123
	eExon 15 RS2	CTAAGGGGAAGGACACATCGT	CCAGCGTTGACAGAGTAACCT	120
Dlx5 promoter	p5 RS1	CTTGATCTGCCTCAGGGATAG	CGCTCTTGAAAAAGGTCTGG	132
	p5 RS2	TTCCTGAATACCTTGCCACTG	GGCTCCTGAACTGAGACAAGA	135
Dlx6 promoter	p6 RS1	ATATCCAACCCCAAAACCAAG	CAGCTTCACCATCCTTTGACT	138
	p6 RS2	TTTGATACACGCGAGCAGAAT	CCAACGCCTAAAGCTATACCA	131
Dync1i1 promoter	pDyn RS1	GCCTATGTTCAACCGTACCTG	GCAACTTTCACTCCCAGACAG	98
	pDyn RS2	AAGGAATTGCTTCCAGACATT	ACTTCCACAATGGCACAAACT	140
Centromeric control	Centro RS1	GTTCCCCAAAGAGAAGGTGTC	AGCTGGCAATTTTGGCAATTA	110
Telomeric control	Telo RS1	AAGGGGAGGACTGCAAAACTA	AGGCTCACAACTTCACTCGAA	221

## Sheet: Gene expression primers 
Supplemental Table 5: qPCR primers used for gene expresssion analyses
Primers	Forward primer	Reverse primer	PCR size (bp)
Beta actin	GGCTGTATTCCCCTCCATCG	CCAGTTGGTAACAATGCCATGT	158
Dync1i1	CCCATCGACTTTTCTCATCTG	GGACCACATGACATCGTACAC	132
Dlx5	TCTCTAGGACTGACGCAAACA	GTTACACGCCATAGGGTCGC	132
Dlx6	GTATGCCTCCCAACAGCTACA	GCCATGTTTGTGCAGATTCTT	163
Hdac9	GTCCCTGCCCAATATCACTCT	TGTCTGAGCATCTGTGTCTCG	105
Twist1	CATGTCCGCGTCCCACTA	TTTTTAGTTATCCAGCTCCAGAGTC	125
